# Supplementary material
Source: publisher figshare collection journal article supplement (https://asha.figshare.com/articles/dataset/_/10093538)
Supplement: Supplementary file 1 [file 1]

**Supplemental Material S4.** Overlap-based metrics and effect size metrics for percentage of correctly identified symbols.

| Participant   | NAP metric |      |              |           | WC-SMD |      |              | Demonstrations of effect |                      | Functional relation |
|---------------|------------|------|--------------|-----------|--------|------|--------------|--------------------------|----------------------|---------------------|
|               | NAP        | SE   | 95% CI       | Magnitude | WC-SMD | SE   | 95% CI       | Demonstration            | Actual/<br>potential |                     |
| <b>Tate</b>   |            |      |              |           |        |      |              |                          | 2/4                  | NO                  |
| Tier 1        | .94*       | 0.06 | [0.65–0.99]  | Medium    | 5.05*  | 1.55 | [2.02–8.08]  | X                        |                      |                     |
| Tier 2        | —          | —    | —            | —         |        |      |              |                          |                      |                     |
| Tier 3        | .94*       | 0.05 | [0.68–0.99]  | Medium    | 1.70*  | 0.59 | [0.54–2.86]  | X                        |                      |                     |
| Tier 4        | .85*       | 0.11 | [0.46–0.97]  | Small     | 1.13*  | 0.54 | [0.08–2.19]  |                          |                      |                     |
| <b>Lennox</b> |            |      |              |           |        |      |              |                          |                      |                     |
| Tier 1        | 1.00*      | 0.00 | [1.00–1.00]  | Large     | 1.32*  | 0.55 | [0.26–2.40]  | X                        | 4/4                  | YES                 |
| Tier 2        | 1.00*      | 0.00 | [1.00–1.00]  | Large     | 3.09*  | 0.93 | [1.26–4.92]  | X                        |                      |                     |
| Tier 3        | 1.00*      | 0.00 | [1.00–1.00]  | Large     | 2.16*  | 0.53 | [1.13–3.19]  | X                        |                      |                     |
| Tier 4        | .96*       | 0.04 | [0.68–1.00]  | Medium    | 2.20*  | 0.51 | [1.19–3.21]  | X                        |                      |                     |
| <b>Paul</b>   |            |      |              |           |        |      |              |                          |                      |                     |
| Tier 1        | .97*       | 0.03 | [0.70–1.00]  | Large     | 1.91*  | 0.58 | [0.78–3.03]  | X                        | 4/4                  | YES                 |
| Tier 2        | 1.00*      | 0.00 | [1.00–1.00]  | Large     | 3.02*  | 0.66 | [1.73–4.31]  | X                        |                      |                     |
| Tier 3        | .99*       | 0.01 | [0.80–1.00]  | Large     | 3.10*  | 0.74 | [1.65–4.55]  | X                        |                      |                     |
| Tier 4        | .93*       | 0.83 | [0.62–0.984] | Medium    | 4.37*  | 1.43 | [1.56–7.17]  | X                        |                      |                     |
| <b>Sasha</b>  |            |      |              |           |        |      |              |                          |                      |                     |
| Tier 1        | .97*       | 0.04 | [0.67–1.00]  | Large     | 3.40*  | 1.01 | [1.42–5.39]  |                          |                      |                     |
| Tier 2        | 1.00*      | 0.00 | [1.00–1.00]  | Large     | 1.50*  | 0.50 | [0.52–2.48]  | X                        | 3/4                  | YES                 |
| Tier 3        | 1.00*      | 0.00 | [1.00–1.00]  | Large     | 7.06*  | 1.83 | [3.48–10.64] | X                        |                      |                     |
| Tier 4        | 1.00*      | 0.00 | [1.00–1.00]  | Large     | 3.05*  | 0.74 | [1.60–4.51]  | X                        |                      |                     |

*Note.* CI = confidence interval; NAP = nonoverlap of all pairs (Parker & Vannest, 2009); WC-SMD = within-case standard mean difference; *SE* = standard error. Criteria for NAP estimates for no effect, small effect, and large effect were based on Peterson-Brown, Karich, and Symons (2012). No effect  $\leq .50$ ; small = .51–.93; medium = .93–.96; large  $\geq .96$ . \*Significant estimate, as 95% confidence interval does not include zero.

## References

- Parker, R. I., & Vannest, K. (2009). An improved effect size for single-case research: Nonoverlap of all pairs. *Behavior Therapy*, 40, 357–363. <https://doi.org/10.1016/j.beth.2008.10.006>
- Petersen-Brown, S., Karich, A. C., & Symons, F. J. (2012). Examining estimates of effect using non-overlap of all pairs in multiple baseline studies of academic intervention. *Journal of Behavioral Education*, 21, 203–216. <https://doi.org/10.1007/s10864-012-9154-0>
