# Supplementary material
Source: publisher figshare collection journal article supplement (https://asha.figshare.com/articles/dataset/_/10093538)
Supplement: Supplementary file 2 [file 1]

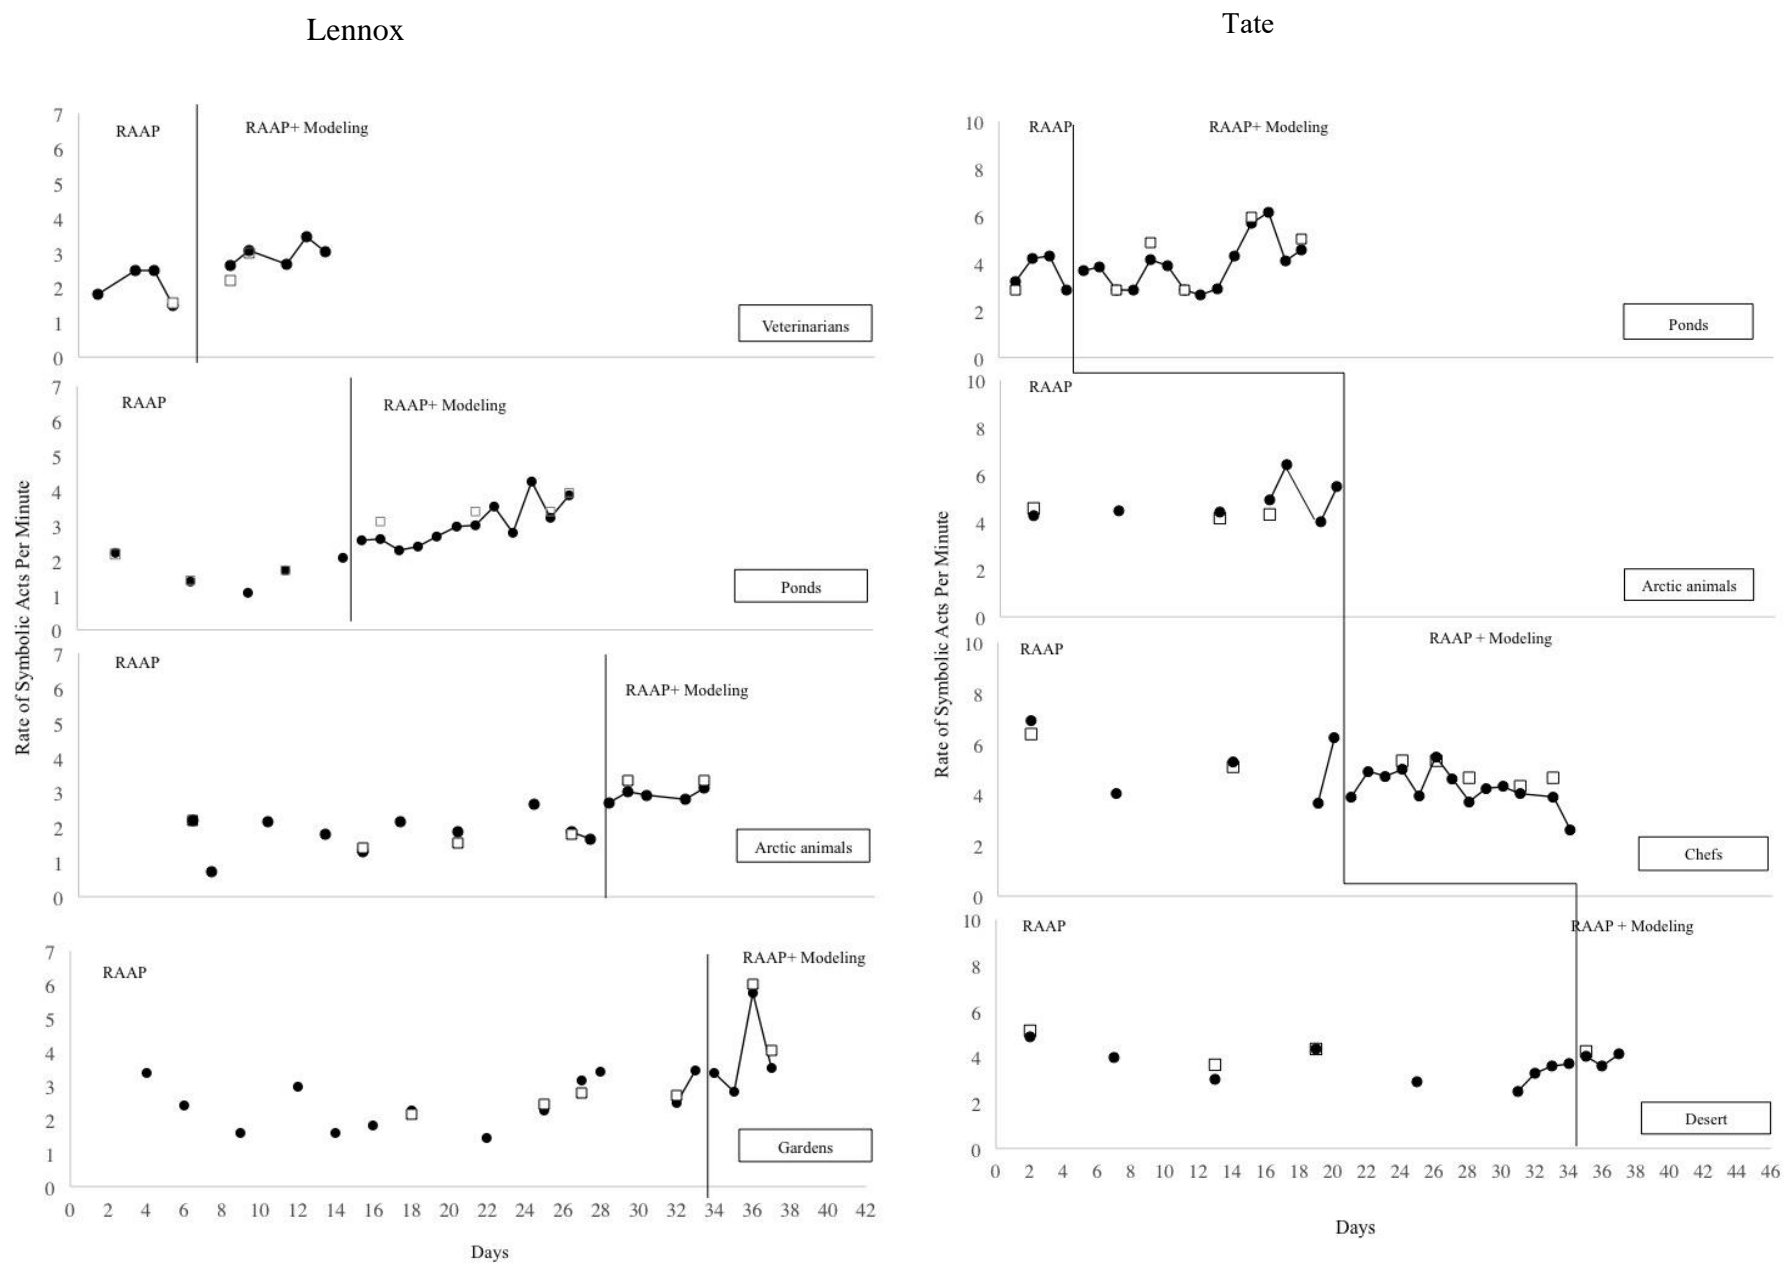

Supplemental Material S3.A. *Graphing of interobserver agreement to detect bias for Tate and Lennox.*

Paul

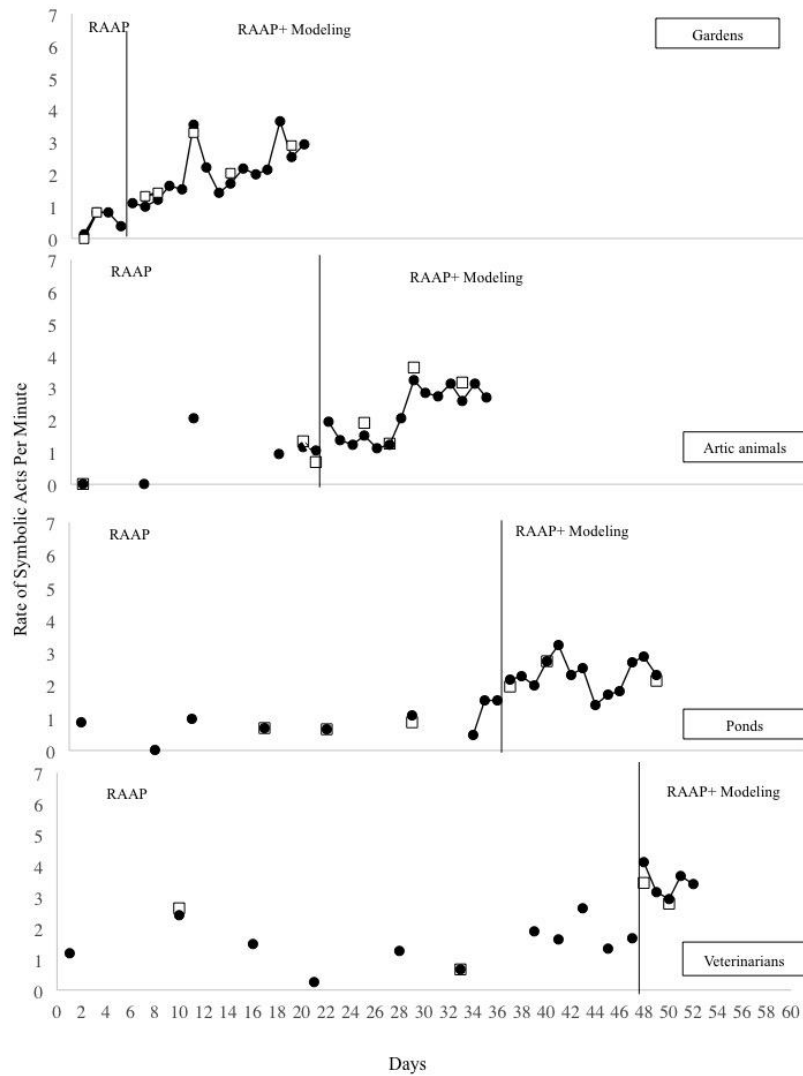

Sasha

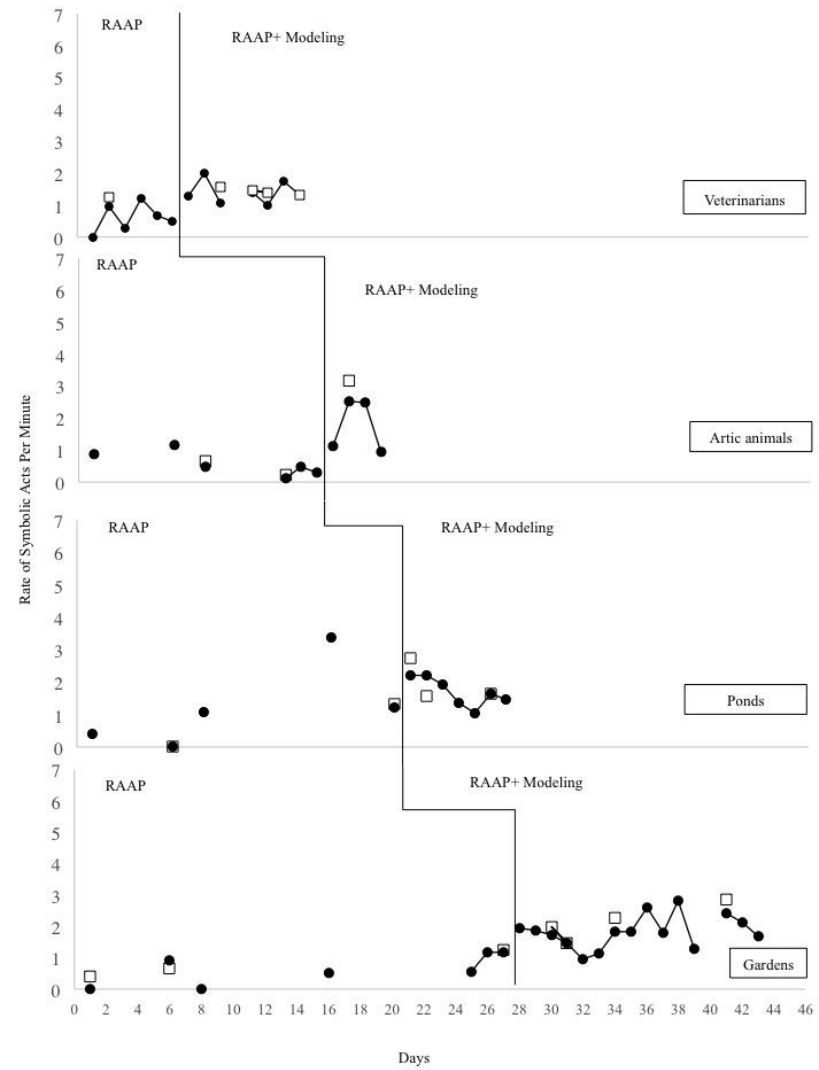

Supplemental Material S3.B. *Graphing of interobserver agreement to detect bias for Paul and Sasha.*
