# Supplementary material
Source: publisher figshare collection journal article supplement (https://asha.figshare.com/articles/dataset/_/10093538)
Supplement: Supplementary file 3 [file 1]

**Supplemental Material S5.** Overlap-based metrics and effect size metrics for rate of symbolic communication.

| Participant   | NAP Metric |      |             |           | WC-SMD |      |               | Number of demonstrations |                  | Functional relation |
|---------------|------------|------|-------------|-----------|--------|------|---------------|--------------------------|------------------|---------------------|
|               | NAP        | SE   | 95% CI      | Magnitude | WC-SMD | SE   | 95% CI        | Demonstration            | Actual/potential |                     |
| <b>Tate</b>   |            |      |             |           |        |      |               |                          | 0/4              | NO                  |
| Tier 1        | .45*       | 1.41 | [0.20–0.74] | No effect | 0.19   | 0.52 | [–0.83–1.21]  |                          |                  |                     |
| Tier 2        | —          | —    | —           | —         | —      | —    | —             |                          |                  |                     |
| Tier 3        | .41*       | 0.19 | [0.19–0.69] | No effect | –0.32  | 0.42 | [–1.134–0.50] |                          |                  |                     |
| Tier 4        | .56*       | 0.19 | [0.26–0.81] | No effect | 0.11   | 0.38 | [–0.63–0.84]  |                          |                  |                     |
| <b>Lennox</b> |            |      |             |           |        |      |               |                          | 4/4              | YES                 |
| Tier 1        | 1.00*      | 0.00 | [1.00–1.00] | Large     | 1.47*  | 0.62 | [0.24–2.68]   | X                        |                  |                     |
| Tier 2        | 1.00*      | 0.00 | [1.00–1.00] | Large     | 2.37*  | 0.80 | [0.80–3.93]   | X                        |                  |                     |
| Tier 3        | 1.00*      | 0.00 | [1.00–1.00] | Large     | 2.21*  | 0.58 | [1.07–3.35]   | X                        |                  |                     |
| Tier 4        | .93*       | 0.06 | [0.64–0.99] | Medium    | 1.96*  | 0.75 | [0.49–3.42]   | X                        |                  |                     |
| <b>Paul</b>   |            |      |             |           |        |      |               |                          |                  |                     |
| Tier 1        | 1.00*      | 0.00 | [1.00–1.00] | Large     | 3.61*  | 1.21 | [1.24–5.97]   | X                        | 4/4              | YES                 |
| Tier 2        | .92*       | 0.07 | [0.66–0.99] | Small     | 1.53*  | 0.57 | [0.41–2.65]   | X                        |                  |                     |
| Tier 3        | .98*       | 0.02 | [0.78–0.99] | Large     | 2.69*  | 0.71 | [1.31–4.07]   | X                        |                  |                     |
| Tier 4        | 1.00*      | 0.00 | [1.00–1.00] | Large     | 2.78*  | 0.66 | [1.48–4.07]   | X                        |                  |                     |
| <b>Sasha</b>  |            |      |             |           |        |      |               |                          |                  |                     |
| Tier 1        | 1.00*      | 0.00 | [1.00–1.00] | Large     | 1.83*  | 0.61 | [0.64–3.03]   | X                        | 4/4              | YES                 |
| Tier 2        | .92*       | 0.09 | [0.53–0.99] | Small     | 2.73*  | 1.25 | [0.29–5.18]   | X                        |                  |                     |
| Tier 3        | .74*       | 0.18 | [0.41–0.92] | Small     | 0.31   | 0.40 | [–0.47–1.10]  | X                        |                  |                     |
| Tier 4        | .96*       | 0.04 | [0.73–1.00] | Medium    | 2.02*  | 0.67 | [0.88–3.52]   | X                        |                  |                     |

*Note.* CI = confidence interval; NAP = nonoverlap of all pairs (Parker & Vannest, 2009); WC-SMD = within-case standard mean difference; *SE* = standard error. Criteria for NAP estimates for no effect, small effect, and large effect were based on Peterson-Brown, Karich, and Symons (2012). No effect  $\leq .50$ ; small = .51–.93; medium = .93–.96; large  $\geq .96$ . \*Significant estimate, as 95% confidence interval does not include zero.

## References

- Parker, R. I., & Vannest, K. (2009). An improved effect size for single-case research: Nonoverlap of all pairs. *Behavior Therapy*, 40, 357–363. <https://doi.org/10.1016/j.beth.2008.10.006>
- Petersen-Brown, S., Karich, A. C., & Symons, F. J. (2012). Examining estimates of effect using non-overlap of all pairs in multiple baseline studies of academic intervention. *Journal of Behavioral Education*, 21, 203–216. <https://doi.org/10.1007/s10864-012-9154-0>
