# Supplementary material
Source: publisher figshare collection journal article supplement (https://asha.figshare.com/articles/dataset/_/10093538)
Supplement: Supplementary file 4 [file 1]

**Supplemental Material S6.** Peer rate of augmentative and alternative communication (AAC) use during baseline and intervention for all tiers.

| Participant | Peer     | Tier           | AAC use during baseline |           | AAC use during intervention |           |
|-------------|----------|----------------|-------------------------|-----------|-----------------------------|-----------|
|             |          |                | <i>M (SD)</i>           | Range     | <i>M (SD)</i>               | Range     |
| Tate        | Wynne    | 1              | 1.00 (0.73)             | 0.00–1.75 | 1.00 (0.48)                 | 0.20–1.84 |
|             |          | 2              | 1.39 (1.01)             | 0.43–2.94 | —                           | —         |
|             |          | 3              | 1.25 (0.56)             | 0.33–1.82 | 1.10 (0.55)                 | 0.12–2.21 |
|             |          | 4              | 1.26 (0.62)             | 0.46–1.80 | 1.13 (0.09)                 | 1.07–1.23 |
|             |          | <b>Average</b> | 1.22 (0.16)             | 0.00–2.94 | 1.07 (0.06)                 | 0.20–1.84 |
| Lennox      | Ian      | 1              | 2.52 (0.61)             | 1.96–3.38 | 0.93 (0.74)                 | 0.11–1.82 |
|             |          | 2              | 1.15 (1.00)             | 0.00–2.64 | 0.27 (0.36)                 | 0.00–1.33 |
|             |          | 3              | 0.46 (0.51)             | 0.00–1.46 | 0.21 (0.31)                 | 0.00–0.74 |
|             |          | 4              | 0.69 (1.15)             | 0.00–3.75 | 0.05 (0.12)                 | 0.00–0.27 |
|             |          | <b>Average</b> | 1.20 (0.92)             | 0.00–3.75 | 0.37 (0.39)                 | 0.00–1.82 |
| Paul        | Samantha | 1              | 0.89 (0.42)             | 0.28–1.23 | 1.84 (1.32)                 | 0.35–4.58 |
|             | Mac      | 2              | 2.73 (1.64)             | 0.00–4.46 | 2.05 (0.79)                 | 1.23–4.39 |
|             | Claire   | 3              | 2.57 (1.25)             | 1.02–4.64 | 1.11 (0.43)                 | 0.43–2.01 |
|             |          | 4              | 2.18 (0.64)             | 1.21–3.11 | 1.59 (0.74)                 | 1.00–2.40 |
|             |          | <b>Average</b> | 2.09 (0.83)             | 0.00–4.64 | 1.65 (0.40)                 | 0.37–2.05 |
| Sasha       | Claire   | 1              | 1.67 (0.29)             | 1.37–2.00 | 0.99 (0.39)                 | 0.34–1.60 |
|             |          | 2              | 1.18 (0.93)             | 0.39–3.02 | 1.92 (0.98)                 | 1.04–2.97 |
|             |          | 3              | 2.32 (1.01)             | 1.32–3.92 | 1.21 (0.23)                 | 0.82–1.51 |
|             |          | 4              | 1.97 (1.51)             | 0.68–4.51 | 1.53 (0.68)                 | 0.00–2.69 |
|             |          | <b>Average</b> | 1.79 (0.48)             | 0.00–4.51 | 1.41 (0.40)                 | 0.00–2.97 |
