# Supplementary material
Source: publisher figshare collection journal article supplement (https://asha.figshare.com/articles/dataset/_/10093538)
Supplement: Supplementary file 5 [file 1]

**Supplemental Material S1.** Procedural fidelity across all phases and participants.

| <b>Phase</b>                                    | <b>Lennox</b>   | <b>Paul</b>     | <b>Sasha</b>    | <b>Tate</b>     |
|-------------------------------------------------|-----------------|-----------------|-----------------|-----------------|
|                                                 | Mean<br>(Range) | Mean<br>(Range) | Mean<br>(Range) | Mean<br>(Range) |
| Baseline                                        |                 |                 |                 |                 |
| Vocabulary probe                                | 99<br>(83–100)  | 100             | 100             | 100             |
| RAAP intervention                               | 100             | 100             | 97<br>(83–100)  | 97<br>(83–100)  |
| Generalization thematic play                    | 98<br>(83–100)  | 100             | 100             | 100             |
| Total                                           | 97<br>(88–100)  | 100             | 99<br>(92–100)  | 99<br>91–100    |
| Intervention                                    |                 |                 |                 |                 |
| Vocabulary probe                                | 100             | 99<br>(83–100)  | 100             | 100             |
| RAAP intervention                               | 100             | 99<br>(83–100)  | 100             | 100             |
| Generalization thematic play                    | 97<br>(83–100)  | 99<br>(83–100)  | 98<br>(83–100)  | 98<br>(83–100)  |
| Total                                           | 99<br>(94–100)  | 98<br>(83–100)  | 99<br>(92–100)  | 99<br>(94–100)  |
| Maintenance                                     |                 |                 |                 |                 |
| Total                                           | 100             | 100             | 100             | 100             |
| Overall procedural fidelity                     | 99<br>(92–100)  | 99<br>(92–100)  | 99<br>(92–100)  | 99<br>(92–100)  |
| Interobserver agreement for procedural fidelity | 99<br>(94–100)  | 97<br>(92–100)  | 99<br>(94–100)  | 97<br>(92–100)  |

*Note.* RAAP = Read, Ask, Answer, Prompt intervention.
