# Supplementary material
Source: publisher figshare collection journal article supplement (https://asha.figshare.com/articles/dataset/_/10093538)
Supplement: Supplementary file 6 [file 1]

**Supplemental Material S2.** Percentage of interobserver-agreement across phases and dependent variables.

| Participant | Condition      | Primary outcome                         | Secondary outcome           | Corollary measures        |                             |
|-------------|----------------|-----------------------------------------|-----------------------------|---------------------------|-----------------------------|
|             |                | Percentage correctly identified symbols | Symbolic communication acts | Number of different words | Number of word combinations |
| Lennox      | Baseline       | 99.5<br>(92–100)                        | 87<br>(80–94)               | 87<br>(67–100)            | 93<br>(67–100)              |
|             | Intervention   | 100                                     | 87<br>(83–95)               | 87<br>(75–100)            | 94<br>(80–100)              |
|             | Generalization | —                                       | 91<br>(83–100)              | —                         | —                           |
|             | Maintenance    | 100                                     | —                           | —                         | —                           |
| Paul        | Baseline       | 100                                     | 89<br>(85–93)               | 87<br>(57–100)            | 91<br>(50–100)              |
|             | Intervention   | 99.5<br>(92–100)                        | 90<br>(80–97)               | 91<br>(78–100)            | 88<br>(50–100)              |
|             | Generalization | —                                       | 90<br>(80–97)               | —                         | —                           |
|             | Maintenance    | 100                                     | —                           | —                         | —                           |
| Sasha       | Baseline       | 100                                     | 94<br>(86–96)               | 85<br>(50–100)            | 92<br>(50–100)              |
|             | Intervention   | 100                                     | 90<br>(86–95)               | 89<br>(50–100)            | 85<br>(33–100)              |
|             | Generalization | —                                       | 96<br>(89–100)              | —                         | —                           |
|             | Maintenance    | 97<br>(92–100)                          | —                           | —                         | —                           |
| Tate        | Baseline       | 100                                     | 92<br>(88–96)               | 96<br>(81–100)            | 98<br>(50–100)              |
|             | Intervention   | 99.5<br>(92–100)                        | 91<br>(87–96)               | 92<br>(75–100)            | 97<br>(71–100)              |
|             | Generalization | —                                       | 91<br>(85–97)               | —                         | —                           |
|             | Maintenance    | 100                                     | —                           | —                         | —                           |

*Note.* Mean is given as percent agreement.
